# Supplementary material for: An Analysis of the Global Expression of MicroRNAs in an Experimental Model of Physiological Left Ventricular Hypertrophy
Source: PLoS One. 2014 Apr 21;9(4):e93271. doi: 10.1371/journal.pone.0093271 (PMC3994002; doi:10.1371/journal.pone.0093271)
Supplement: Table S2 — Predicted targets subjected to functional analyses using DAVID tools to query KEGG pathways enriched with the miR targets. (XLSX) [file pone.0093271.s002.xlsx]

## Sheet: enrichment_analysis
Supplementary Table 2. KEGG signaling pathways enriched with predicted targets of miR-26b, -27a, -143 and -150.
Cluster *	KEGG pathway term	Count	%	PValue	ListTotal	PopHits	PopTotal	FoldEnrichment	Bonferroni	Benjamini	FDR
Annotation Cluster 1	hsa04012:ErbB signaling pathway	18	22.7848	4.97385e-15	79	87	5085	13.3173	4.89608e-13	9.79217e-14	5.52891e-12
	hsa04912:GnRH signaling pathway	18	22.7848	4.05802e-14	79	98	5085	11.8225	3.98215e-12	5.68878e-13	4.49307e-11
	hsa04664:Fc epsilon RI signaling pathway	15	18.9873	5.62046e-12	79	78	5085	12.3783	5.50809e-10	5.50809e-11	6.21465e-09
	hsa04722:Neurotrophin signaling pathway	15	18.9873	3.44158e-09	79	124	5085	7.78634	3.37275e-07	1.98397e-08	3.80539e-06
	hsa04910:Insulin signaling pathway	15	18.9873	1.05686e-08	79	135	5085	7.1519	1.03572e-06	5.754e-08	1.16858e-05
Annotation Cluster 2	hsa05410:Hypertrophic cardiomyopathy (HCM)	15	18.9873	1.91859e-11	79	85	5085	11.3589	1.88022e-09	1.56685e-10	2.1214e-08
	hsa05414:Dilated cardiomyopathy	15	18.9873	5.85099e-11	79	92	5085	10.4946	5.73397e-09	4.41074e-10	6.4695e-08
	hsa05412:Arrhythmogenic right ventricular cardiomyopathy (ARVC)	12	15.1899	1.38261e-08	79	76	5085	10.1632	1.35496e-06	6.7748e-08	1.52877e-05
Annotation Cluster 3	hsa04660:T cell receptor signaling pathway	22	27.8481	1.95279e-18	79	108	5085	13.1118	1.91373e-16	9.56865e-17	2.15922e-15
	hsa04662:B cell receptor signaling pathway	13	16.4557	8.58302e-10	79	75	5085	11.157	8.41136e-08	5.2571e-09	9.49034e-07
	hsa04650:Natural killer cell mediated cytotoxicity	14	17.7215	7.70835e-08	79	133	5085	6.77548	7.55416e-06	3.59723e-07	8.5232e-05
	hsa04062:Chemokine signaling pathway	13	16.4557	2.22343e-05	79	187	5085	4.47472	0.00217662	7.51347e-05	0.024582
* Functional annotation analysis was conducted using DAVID tools to query KEGG pathways enriched with predicted miRNA targets. The analysis was conducted using the fuzzy clustering algorithm in order to reduce the redundancy among functionally related pathways that share similar target genes. An enriched sublist derived from all miR targets combined was used to obtain the statistics above, which …
